# Supplementary material for: Direct and remote control of electronic structures and redox potentials in μ-oxo diferric complexes
Source: Royal Society of Chemistry journal article supplement (doi:10.1039/d3dt02734a), 2023-01-01
Supplement: d3dt02734a1.pdf [file d3dt02734a1.pdf]

Electronic Supplementary Information  
for

**Direct and Remote Control on Electronic Structures and  
Redox Potentials in  $\mu$ -Oxo Diferric Complexes**

**Sebastian Finke, Anja Stammer, Jan Oldengott, Stephan Walleck, and Thorsten  
Glaser\***

*Lehrstuhl für Anorganische Chemie I, Fakultät für Chemie, Universität  
Bielefeld, Universitätsstr. 25, D-33615 Bielefeld, Germany*

*\* To whom correspondence should be addressed. E-mail:*

*thorsten.glaser@unibielefeld.de (T.G.)*

**Table S1.** Crystal data and refinement parameters.

|                                                                                      | [(susan <sup>OMe</sup> )FeCl( $\mu$ -O)FeCl](ClO <sub>4</sub> ) <sub>2</sub>                   | [(susan <sup>OMe</sup> )Fe(OAc)( $\mu$ -O)Fe(OAc)](ClO <sub>4</sub> ) <sub>2</sub> •MeCN       | [(susan <sup>OMe</sup> )Fe( $\mu$ -O)( $\mu$ -OAc)Fe](ClO <sub>4</sub> ) <sub>3</sub> •2MeCN    | [(susan <sup>OMe</sup> )Fe(OH)( $\mu$ -O)Fe(OH)](ClO <sub>4</sub> ) <sub>2</sub> •2C <sub>3</sub> H <sub>7</sub> OH | [(susan <sup>OMe</sup> )Fe(OAc) <sub>0.8</sub> (HCOO) <sub>0.2</sub> ( $\mu$ -O)Fe(OH)](ClO <sub>4</sub> ) <sub>2</sub> •C <sub>3</sub> H <sub>6</sub> O |
|--------------------------------------------------------------------------------------|------------------------------------------------------------------------------------------------|------------------------------------------------------------------------------------------------|-------------------------------------------------------------------------------------------------|---------------------------------------------------------------------------------------------------------------------|----------------------------------------------------------------------------------------------------------------------------------------------------------|
| Empirical formula                                                                    | C <sub>44</sub> H <sub>66</sub> Cl <sub>4</sub> Fe <sub>2</sub> N <sub>8</sub> O <sub>13</sub> | C <sub>50</sub> H <sub>75</sub> Cl <sub>2</sub> Fe <sub>2</sub> N <sub>9</sub> O <sub>17</sub> | C <sub>50</sub> H <sub>75</sub> Cl <sub>3</sub> Fe <sub>2</sub> N <sub>10</sub> O <sub>19</sub> | C <sub>50</sub> H <sub>84</sub> Cl <sub>2</sub> Fe <sub>2</sub> N <sub>8</sub> O <sub>17</sub>                      | C <sub>48.8</sub> H <sub>75.6</sub> Cl <sub>2</sub> Fe <sub>2</sub> N <sub>8</sub> O <sub>17</sub>                                                       |
| Formula weight                                                                       | 1168.54                                                                                        | 1256.79                                                                                        | 1338.25                                                                                         | 1251.85                                                                                                             | 1229.18                                                                                                                                                  |
| Crystal system                                                                       | triclinic                                                                                      | monoclinic                                                                                     | triclinic                                                                                       | monoclinic                                                                                                          | monoclinic                                                                                                                                               |
| Space group                                                                          | <i>P</i> $\bar{1}$                                                                             | <i>P</i> 2 <sub>1</sub> / <i>c</i>                                                             | <i>P</i> $\bar{1}$                                                                              | <i>C</i> 2/ <i>c</i>                                                                                                | <i>P</i> 2 <sub>1</sub> / <i>c</i>                                                                                                                       |
| <i>a</i> [Å]                                                                         | 14.7196(5)                                                                                     | 19.5346(8)                                                                                     | 11.7251(4)                                                                                      | 25.2522(9)                                                                                                          | 13.2834(7)                                                                                                                                               |
| <i>b</i> [Å]                                                                         | 14.9845(5)                                                                                     | 13.2801(6)                                                                                     | 13.1324(5)                                                                                      | 15.5311(5)                                                                                                          | 15.3781(6)                                                                                                                                               |
| <i>c</i> [Å]                                                                         | 15.0801(5)                                                                                     | 22.9179(11)                                                                                    | 20.1201(7)                                                                                      | 16.9805(5)                                                                                                          | 28.2323(14)                                                                                                                                              |
| $\alpha$ [°]                                                                         | 106.420(2)                                                                                     | 90                                                                                             | 80.277(2)                                                                                       | 90                                                                                                                  | 90                                                                                                                                                       |
| $\beta$ [°]                                                                          | 110.555(2)                                                                                     | 103.358(2)                                                                                     | 77.367(2)                                                                                       | 118.7610(10)                                                                                                        | 102.469(2)                                                                                                                                               |
| $\gamma$ [°]                                                                         | 110.926(2)                                                                                     | 90                                                                                             | 87.802(2)                                                                                       | 90                                                                                                                  | 90                                                                                                                                                       |
| <i>V</i> [Å <sup>3</sup> ]                                                           | 2572.90(16)                                                                                    | 5784.5(5)                                                                                      | 2979.64(19)                                                                                     | 5838.1(3)                                                                                                           | 5631.1(5)                                                                                                                                                |
| <i>Z</i>                                                                             | 2                                                                                              | 4                                                                                              | 2                                                                                               | 4                                                                                                                   | 4                                                                                                                                                        |
| $\rho$ [g cm <sup>-3</sup> ]                                                         | 1.508                                                                                          | 1.443                                                                                          | 1.492                                                                                           | 1.424                                                                                                               | 1.450                                                                                                                                                    |
| $\mu$ [mm <sup>-1</sup> ]                                                            | 7.019                                                                                          | 0.670                                                                                          | 5.824                                                                                           | 5.453                                                                                                               | 5.645                                                                                                                                                    |
| <i>F</i> (000)                                                                       | 1220.0                                                                                         | 2640.0                                                                                         | 1400.0                                                                                          | 2648.0                                                                                                              | 2586.0                                                                                                                                                   |
| Crystal size [mm <sup>3</sup> ]                                                      | 0.14 × 0.13 × 0.04                                                                             | 0.29 × 0.19 × 0.08                                                                             | 0.32 × 0.25 × 0.08                                                                              | 0.31 × 0.14 × 0.13                                                                                                  | 0.23 × 0.11 × 0.04                                                                                                                                       |
| Radiation                                                                            | CuK $\alpha$ ( $\lambda$ = 1.54178 Å)                                                          | MoK $\alpha$ ( $\lambda$ = 0.71073 Å)                                                          | CuK $\alpha$ ( $\lambda$ = 1.54178 Å)                                                           | CuK $\alpha$ ( $\lambda$ = 1.54178 Å)                                                                               | CuK $\alpha$ ( $\lambda$ = 1.54178 Å)                                                                                                                    |
| 2 $\theta$ range [°]                                                                 | 7.08 to 137.53                                                                                 | 2.14 to 60.07                                                                                  | 4.56 to 136.73°                                                                                 | 6.95 to 138.69                                                                                                      | 6.41 to 136.66                                                                                                                                           |
| <i>hkl</i> ranges                                                                    | -17 ≤ <i>h</i> ≤ 17<br>-17 ≤ <i>k</i> ≤ 18<br>-18 ≤ <i>l</i> ≤ 18                              | -27 ≤ <i>h</i> ≤ 27<br>-18 ≤ <i>k</i> ≤ 18<br>-32 ≤ <i>l</i> ≤ 32                              | -14 ≤ <i>h</i> ≤ 14<br>-15 ≤ <i>k</i> ≤ 15<br>-24 ≤ <i>l</i> ≤ 24                               | -30 ≤ <i>h</i> ≤ 30<br>-18 ≤ <i>k</i> ≤ 18<br>-20 ≤ <i>l</i> ≤ 20                                                   | -13 ≤ <i>h</i> ≤ 15<br>-18 ≤ <i>k</i> ≤ 18<br>-34 ≤ <i>l</i> ≤ 32                                                                                        |
| Collected refl.                                                                      | 39569                                                                                          | 171985                                                                                         | 47373                                                                                           | 51018                                                                                                               | 57750                                                                                                                                                    |
| Unique refl., <i>R</i> <sub>int</sub>                                                | 9173, 0.0698                                                                                   | 16942, 0.0513                                                                                  | 10879, 0.0347                                                                                   | 5427, 0.0324                                                                                                        | 10277, 0.0432                                                                                                                                            |
| Observed refl. ( <i>I</i> > 2 $\sigma$ ( <i>I</i> ))                                 | 7387                                                                                           | 12831                                                                                          | 10392                                                                                           | 5297                                                                                                                | 9269                                                                                                                                                     |
| Completeness                                                                         | 0.963                                                                                          | 1.000                                                                                          | 0.995                                                                                           | 0.995                                                                                                               | 0.994                                                                                                                                                    |
| Data/restraints/param.                                                               | 9173/176/737                                                                                   | 16942/0/779                                                                                    | 10879/4/759                                                                                     | 5427/305/467                                                                                                        | 10277/1/744                                                                                                                                              |
| Goodness-of-fit on <i>F</i> <sup>2</sup>                                             | 1.021                                                                                          | 1.026                                                                                          | 1.030                                                                                           | 1.033                                                                                                               | 1.021                                                                                                                                                    |
| <i>R</i> <sub>1</sub> , <i>wR</i> <sub>2</sub> ( <i>I</i> > 2 $\sigma$ ( <i>I</i> )) | 0.0419, 0.0964                                                                                 | 0.0373, 0.0890                                                                                 | 0.0485, 0.1324                                                                                  | 0.0293, 0.0801                                                                                                      | 0.0333, 0.0839                                                                                                                                           |
| <i>R</i> <sub>1</sub> , <i>wR</i> <sub>2</sub> (all data)                            | 0.0578, 0.1038                                                                                 | 0.0605, 0.1001                                                                                 | 0.0502, 0.1340                                                                                  | 0.0298, 0.0806                                                                                                      | 0.0383, 0.0870                                                                                                                                           |
| Largest peak/hole [e Å <sup>-3</sup> ]                                               | 0.35/-0.39                                                                                     | 0.81/-0.38                                                                                     | 0.91/-0.73                                                                                      | 0.41/-0.30                                                                                                          | 0.68/-0.32                                                                                                                                               |
| CCDC numbers                                                                         | 2289367                                                                                        | 2289371                                                                                        | 2289370                                                                                         | 2289368                                                                                                             | 2289369                                                                                                                                                  |

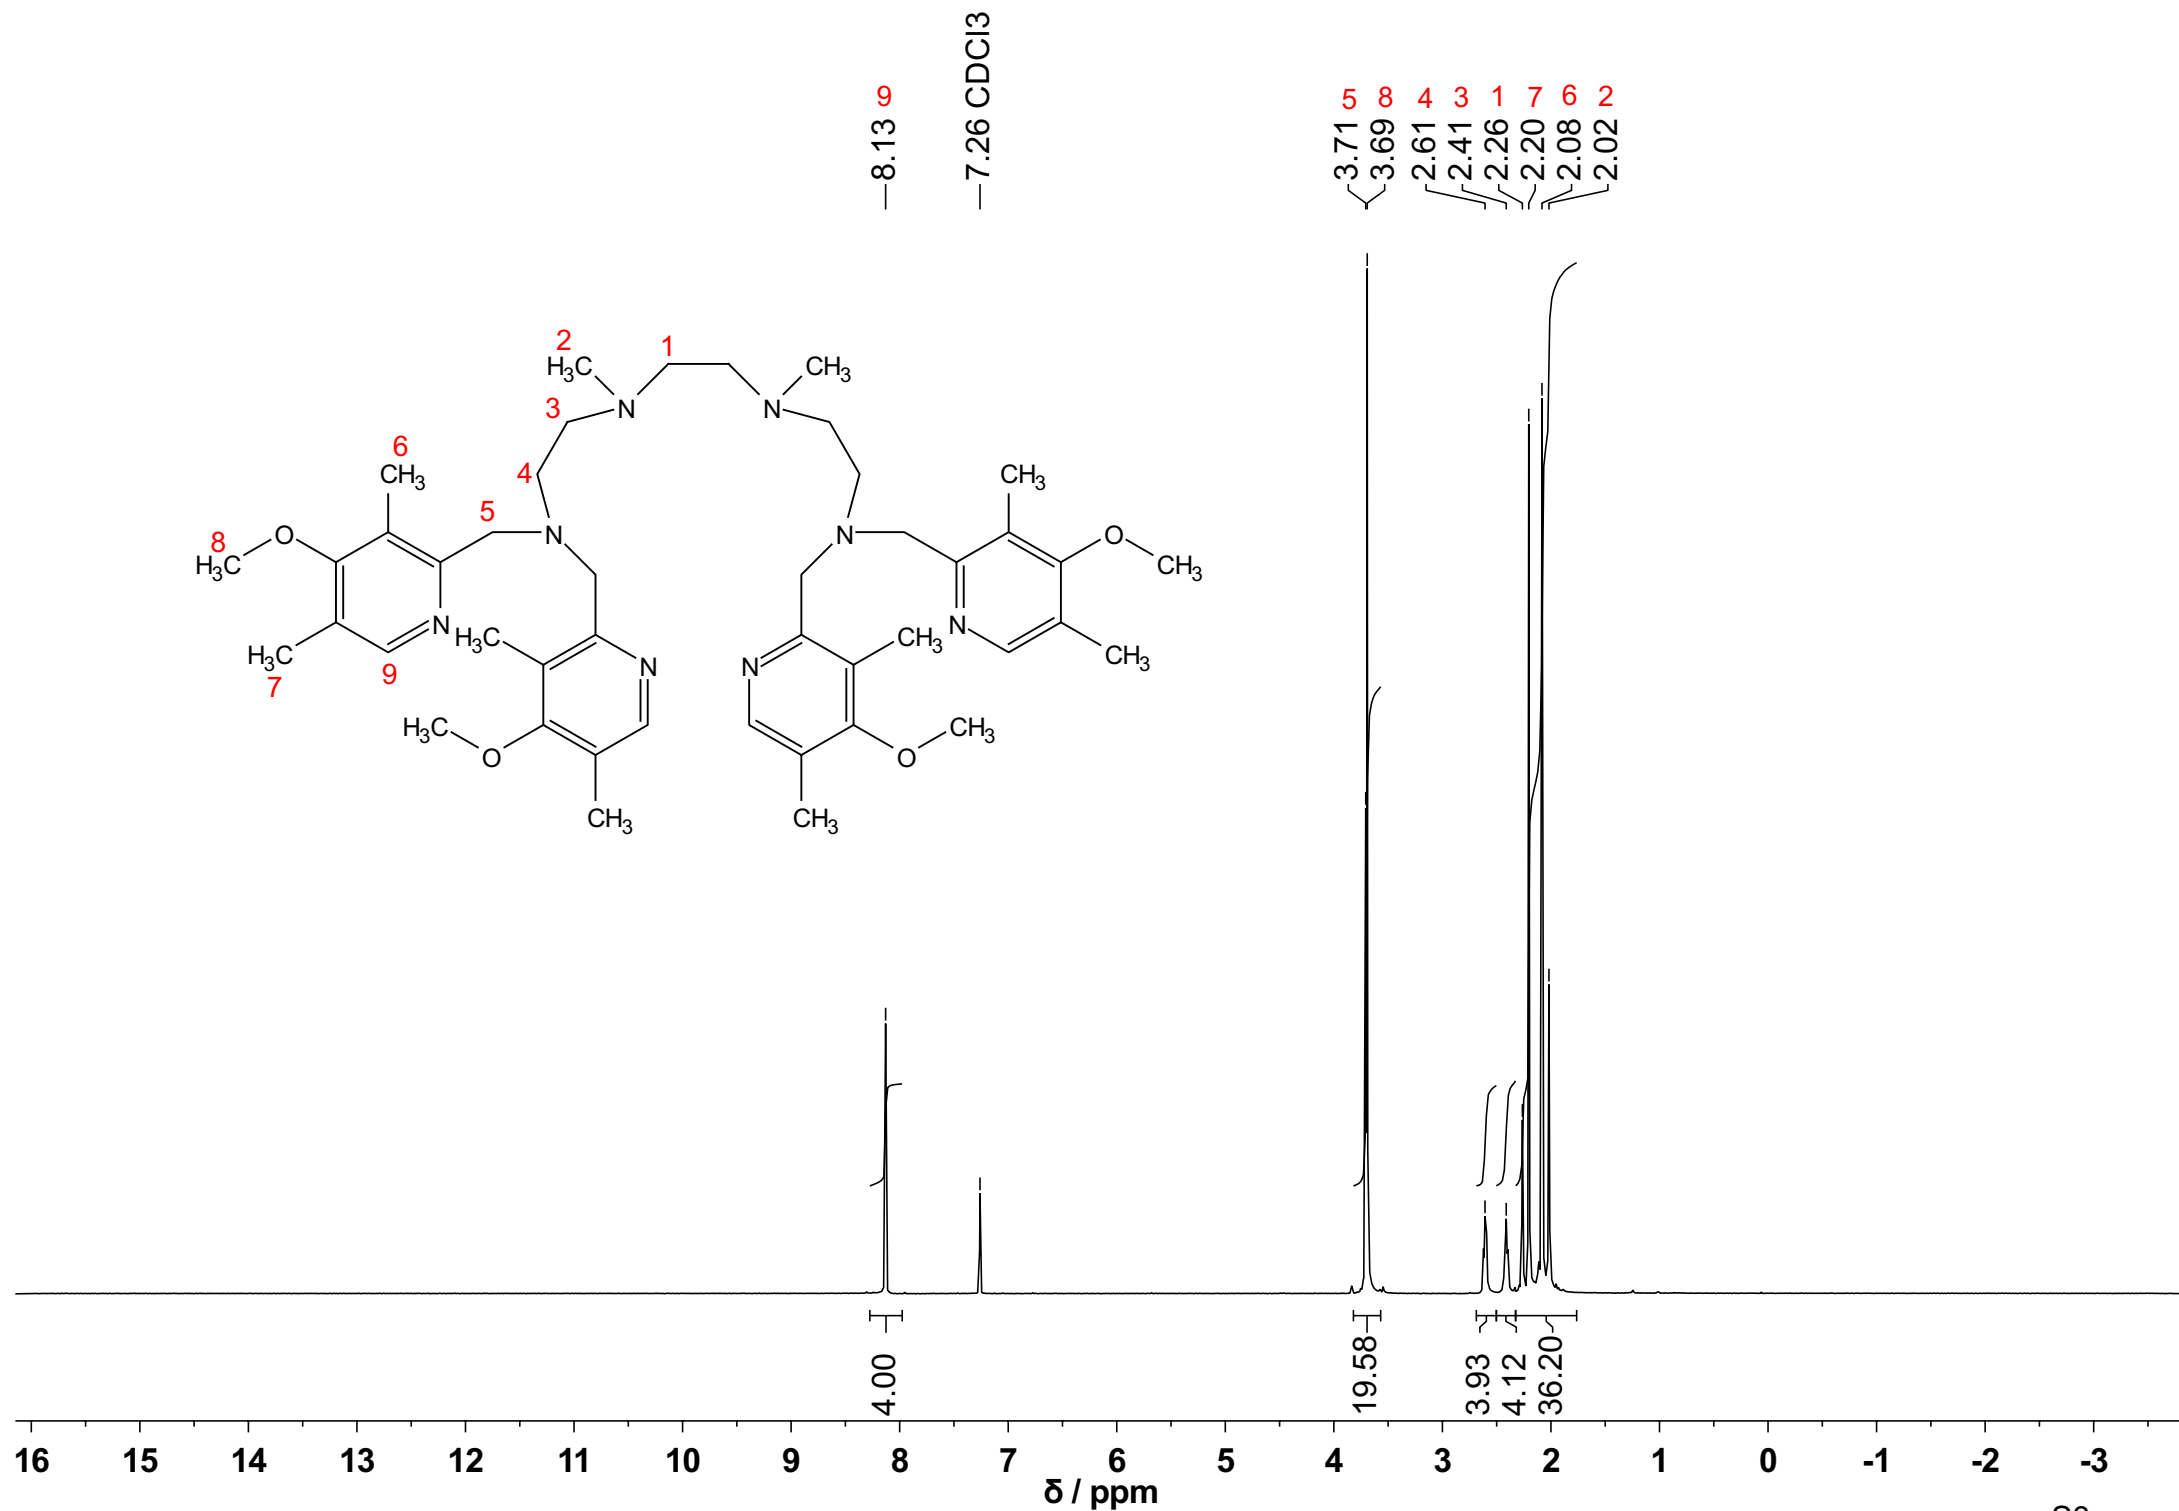

Figure S1. <sup>1</sup>H and <sup>13</sup>C NMR spectra of susan<sup>OMe</sup>.

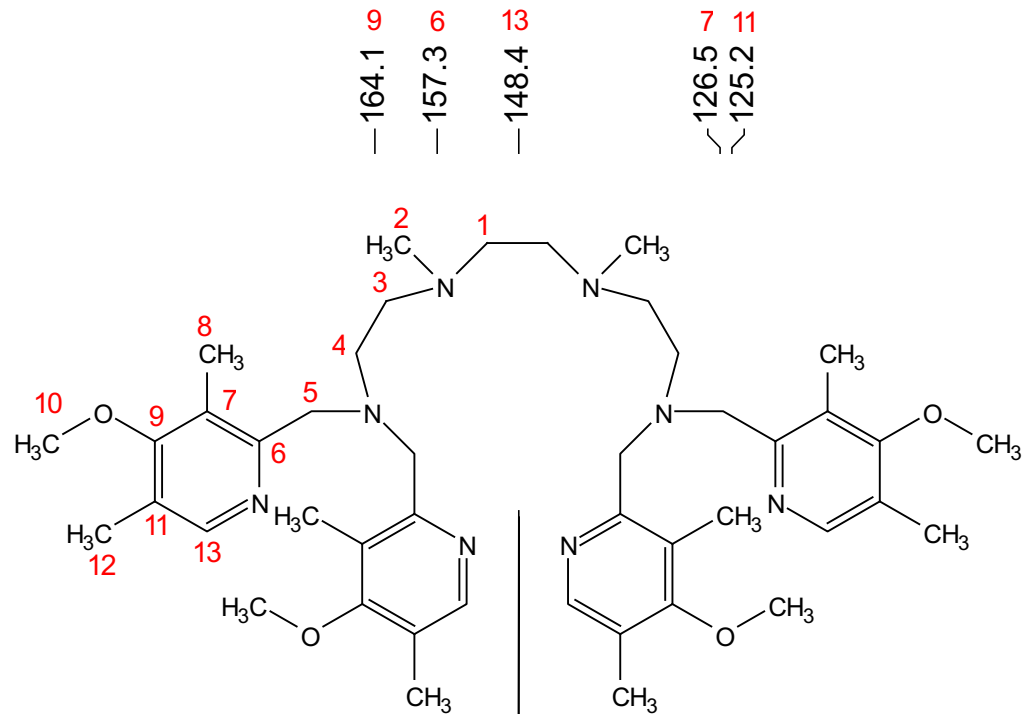

— 164.1 **9**

— 157.3 **6**

— 148.4 **13**

~ 126.5 **7**

~ 125.2 **11**

77.2 CDCl<sub>3</sub>

60.1 **5**

59.9 **10**

55.7 **1**

55.5 **3**

51.9 **4**

— 42.6 **2**

~ 13.4 **12**

~ 10.8 **8**

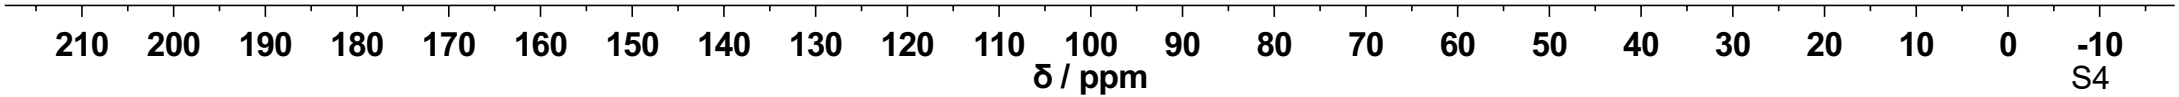

Cont level: 0.2  
● C  
● Fe  
● N  
● O

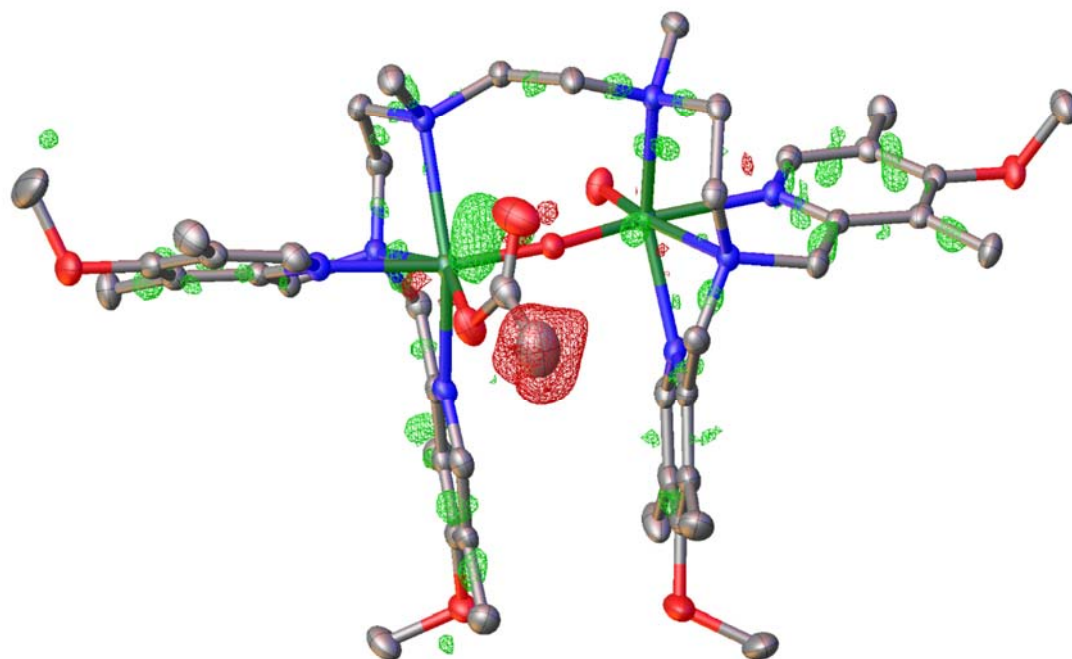

**Figure S2.** Thermal ellipsoide plot including residual electron density map at 0.2 e<sup>-</sup>/Å level, positive residual density green, negative red. The map was calculated for a model with a fully occupied acetate position. The negative e<sup>-</sup>-density was finally better described as an approximately 0.8/0.2 acetate/formiate mixture in crystals of [(susan<sup>OMe</sup>)Fe(OAc)<sub>0.8</sub>(HCOO)<sub>0.2</sub>(μ-O)Fe(OH)](ClO<sub>4</sub>)<sub>2</sub>•acetone.

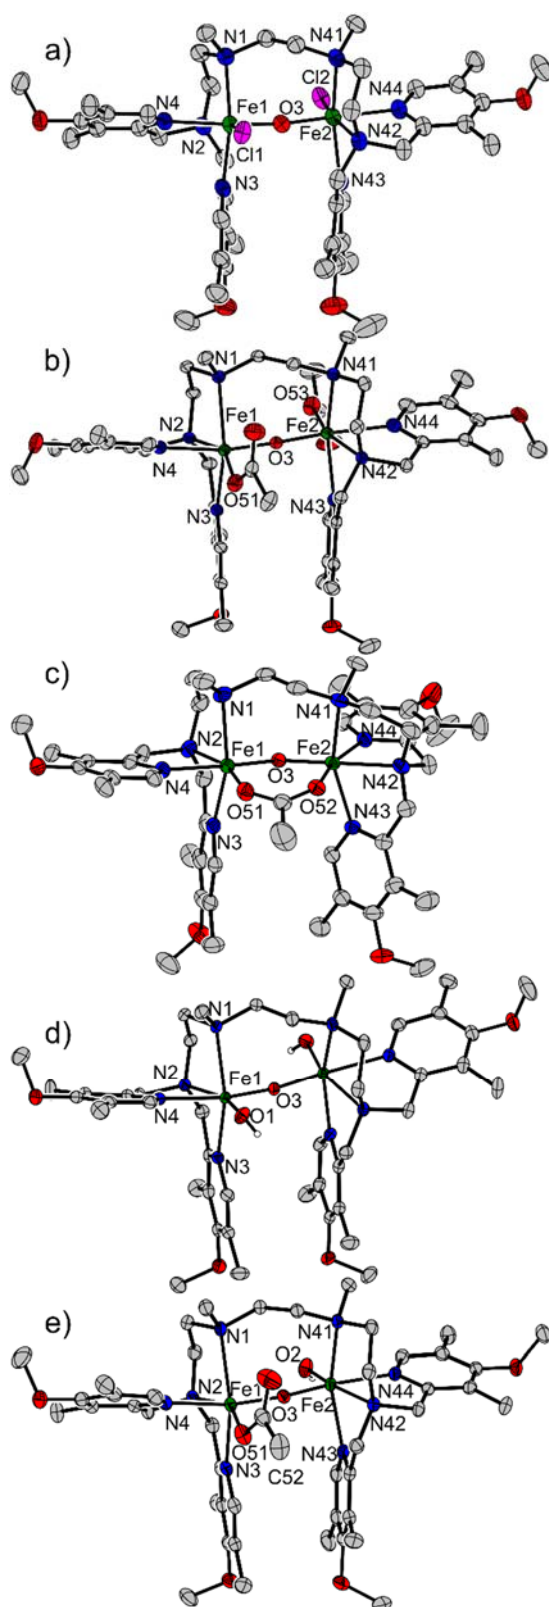

**Figure S3.** Thermal ellipsoid plots of a)  $[(\text{susan}^{\text{OMe}})\{\text{Fe}^{\text{III}}\text{Cl}(\mu\text{-O})\text{Fe}^{\text{III}}\text{Cl}\}]^{2+}$  in single-crystals of  $[(\text{susan}^{\text{OMe}})\{\text{Fe}^{\text{III}}\text{Cl}(\mu\text{-O})\text{Fe}^{\text{III}}\text{Cl}\}](\text{ClO}_4)_2$ , b)  $[(\text{susan}^{\text{OMe}})\{\text{Fe}^{\text{III}}(\text{OAc})(\mu\text{-O})\text{Fe}^{\text{III}}(\text{OAc})\}]^{2+}$  in single-crystals of  $[(\text{susan}^{\text{OMe}})\{\text{Fe}^{\text{III}}(\text{OAc})(\mu\text{-O})\text{Fe}^{\text{III}}(\text{OAc})\}](\text{ClO}_4)_2 \cdot \text{CH}_3\text{CN}$ , c)  $[(\text{susan}^{\text{OMe}})\{\text{Fe}^{\text{III}}(\mu\text{-O})(\mu\text{-OAc})\text{Fe}^{\text{III}}\}]^{3+}$  in single-crystals of  $[(\text{susan}^{\text{OMe}})\{\text{Fe}^{\text{III}}(\mu\text{-O})(\mu\text{-OAc})\text{Fe}^{\text{III}}\}](\text{ClO}_4)_3 \cdot 2\text{CH}_3\text{CN}$ , d)  $[(\text{susan}^{\text{OMe}})\{\text{Fe}^{\text{III}}(\text{OH})(\mu\text{-O})\text{Fe}^{\text{III}}(\text{OH})\}]^{2+}$  in single-crystals of  $[(\text{susan}^{\text{OMe}})\{\text{Fe}^{\text{III}}(\text{OH})(\mu\text{-O})\text{Fe}^{\text{III}}(\text{OH})\}](\text{ClO}_4)_2 \cdot 2i\text{-PrOH}$ , and e)  $[(\text{susan}^{\text{OMe}})\{\text{Fe}^{\text{III}}(\text{OH})(\mu\text{-O})\text{Fe}^{\text{III}}(\text{OAc})\}]^{2+}$  in single-crystals of  $[(\text{susan}^{\text{OMe}})\{\text{Fe}^{\text{III}}(\text{OH})(\mu\text{-O})\text{Fe}^{\text{III}}(\text{OAc})\}](\text{ClO}_4)_2 \cdot \text{acetone}$ .

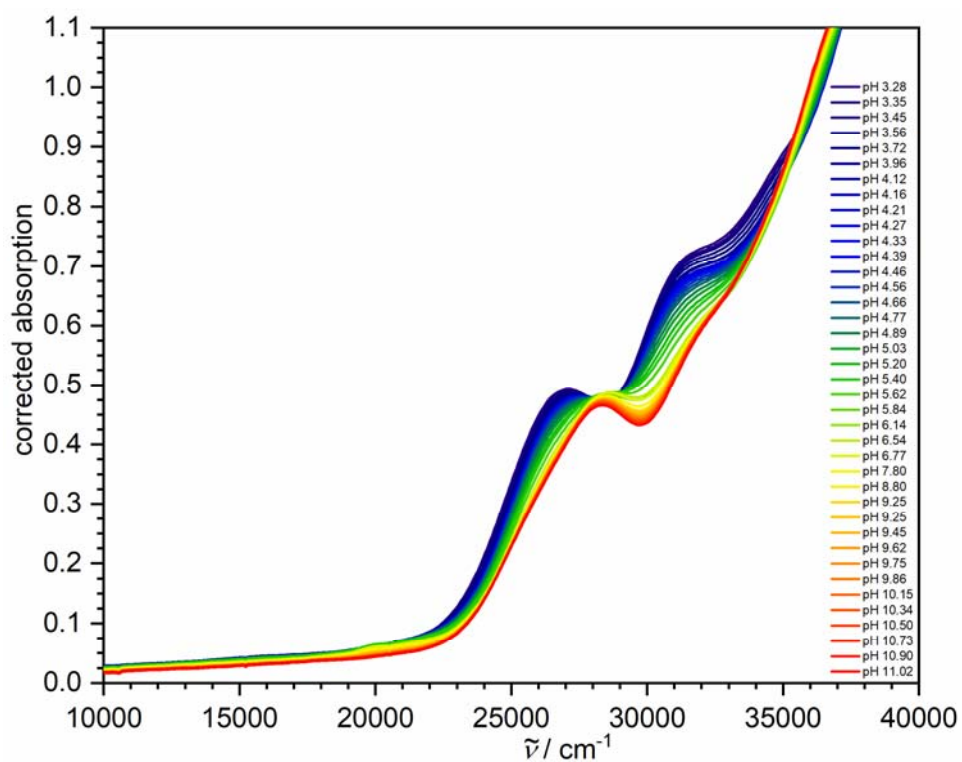

**Figure S4.** UV-Vis spectral changes observed for aqueous solutions of  $[(\text{susan}^{\text{OMe}})\{\text{Fe}^{\text{III}}(\text{OH})(\mu\text{-O})\text{Fe}^{\text{III}}(\text{OH})\}](\text{ClO}_4)_2$  ( $c = 0.07$  mM in 0.01 M  $\text{NaClO}_4 / \text{HClO}_4$ ) in the pH-range 3.28-11.02.

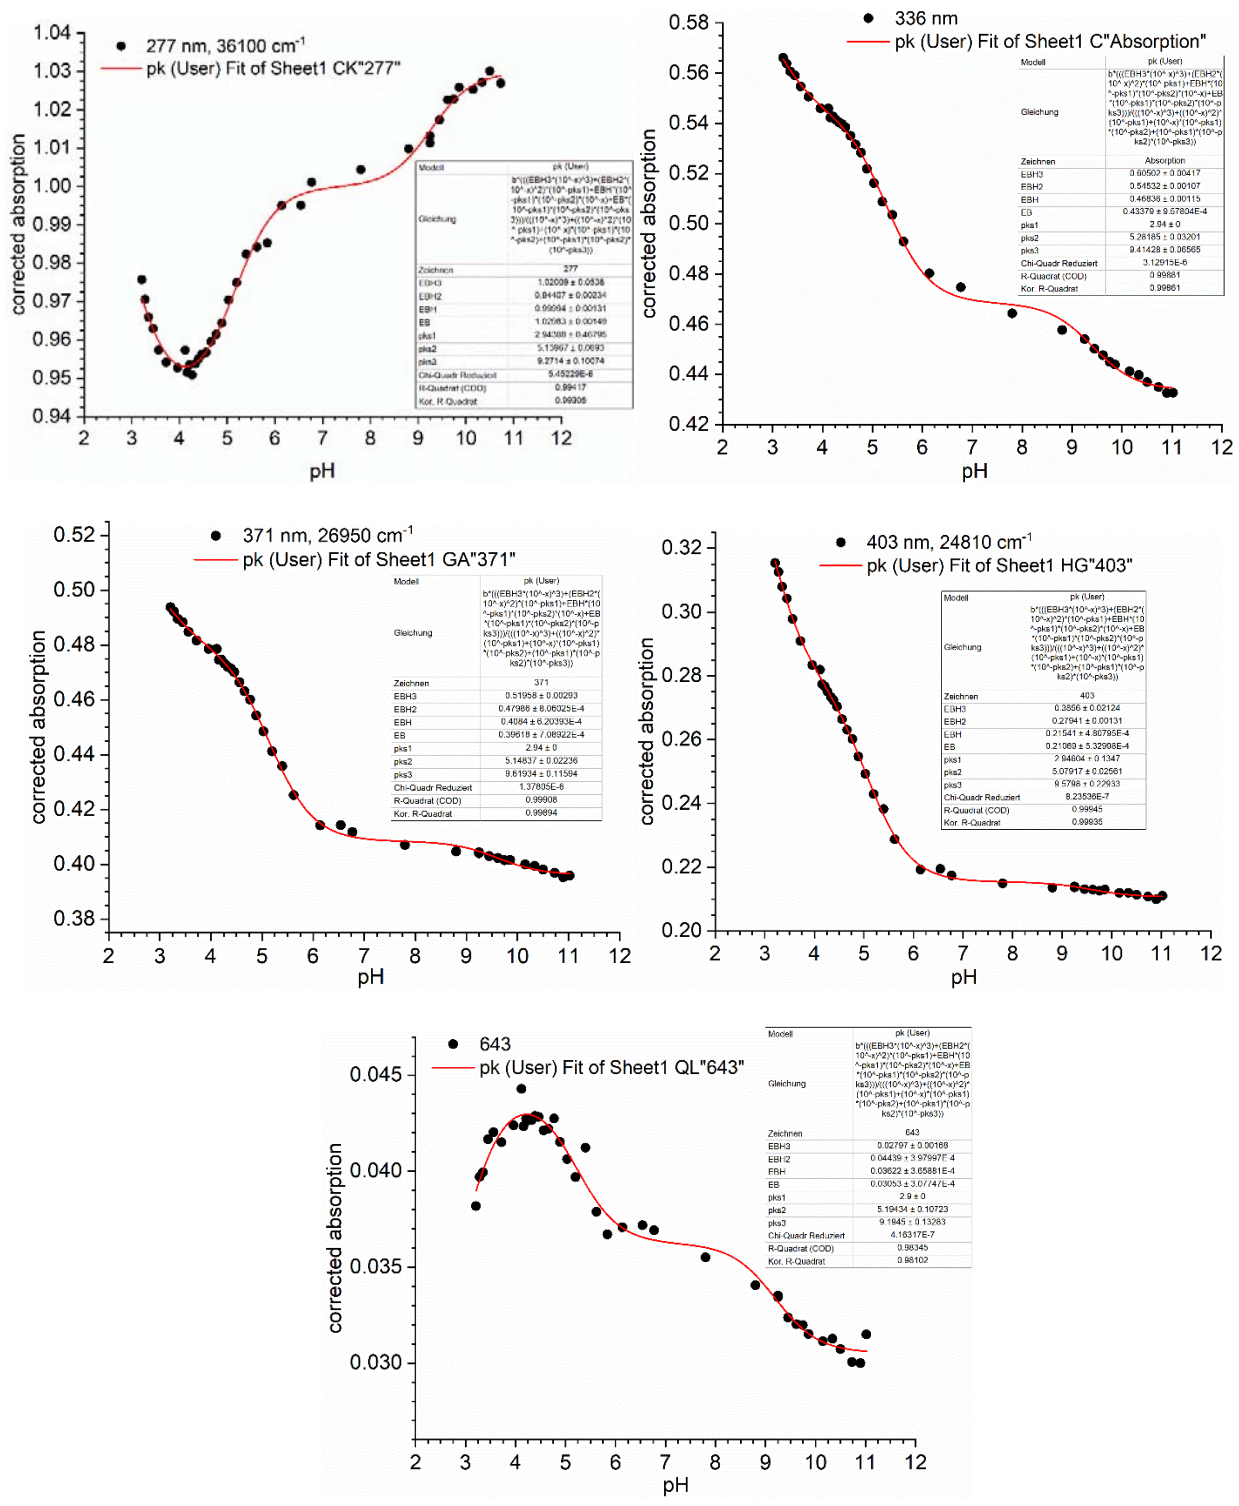

**Figure S5.** pH-Dependence of the corrected absorption at selected energies. Solid lines are fits to the equation for three protonation steps with  $\Delta pK_s \leq 3$ . For experimental conditions see Figure S4.
